# Supplementary material for: A rapid and efficient ion-exchange chromatography for Lu–Hf, Sm–Nd, and Rb–Sr geochronology and the routine isotope analysis of sub-ng amounts of Hf by MC-ICP-MS
Source: Royal Society of Chemistry journal article supplement (doi:10.1039/c5ja00283d), 2015-01-01
Supplement: c5ja00283d1.xlsx [file c5ja00283d1.xlsx]

## Sheet: data
Standard	data source	ID	sample	spiked	digestion	digestion	176Lu/175Lu	ppm		ppb Hf in	Hf analysis	MC-ICP-MS	ppm		% 2sd w/		±2s.e.	est. % 2sd external	175Lu/176S
			weight (g)	analysis?	method	aliquot	of Lu ID	Lu	Zr/Hf	solution	date	replicate	Hf	176Lu/177Hf	error mag	176Hf/177Hf	in 6th digit	uncert. on 176Hf/177Hf	monitor	180Hf/177Hf
BHVO-2	New chemistry, this study
		C	0.0536	spiked	hot plate	1	0.375232	0.269234	0.207679	40 ppb	2014-08-04	a	4.38814	0.0087093	0.250186	0.283106	2.21985	0.00109542	7.52529e-06	2.93372
											2014-11-18	b	4.38772	0.00871014	0.250186	0.283105	3.47744	0.00162438	5.44436e-06	2.93376
											2014-11-25	c	4.38819	0.00870919	0.250186	0.2831	3.09876	0.00137199	5.35975e-06	2.93369
											2014-12-15	d	4.38818	0.00870923	0.250186	0.283111	3.48064	0.0015533	5.30148e-06	2.9337
											2015-03-03	e	4.3883	0.00870898	0.250186	0.283106	2.50248	0.00122782	1.15591e-05	2.9337
											2015-03-30	f	4.3883	0.00870898	0.250186	0.283109	2.50248	0.00147357	-4.50384e-06	2.93378
		D	0.19848	spiked	hot plate
		D-1				0.25	0.328664	0.27252	1.10358	40 ppb	2014-11-25	a	4.40664	0.00877857	0.247547	0.283104	3.12434	0.0013833	6.24576e-06	2.78367
											2014-11-17	b	4.40693	0.00877799	0.247547	0.283102	2.65657	0.000821072	1.3704e-05	2.78357
											2014-11-17	c	4.40709	0.00877769	0.247547	0.283107	3.38096	0.00104495	9.48357e-06	2.78354
											2014-11-17	d	4.4069	0.00877806	0.247547	0.2831	3.16838	0.000979265	1.20922e-05	2.78358
											2014-12-16	e	4.40675	0.00877836	0.247547	0.283103	5.09655	0.0022745	7.31724e-06	2.78366
											2015-03-30	f	4.40685	0.00877816	0.247547	0.283109	3.03859	0.00162748	1.53017e-05	2.78368
										1 ppb	2014-11-24	g	4.4074	0.00877707	0.247547	0.283112	26.6012	0.0158321	4.18408e-05	2.78355
											2014-11-24	h	4.40762	0.00877662	0.247547	0.283096	33.0948	0.0196979	1.94306e-05	2.78351
											2014-11-24	i	4.4088	0.00877425	0.247547	0.283089	32.8743	0.0195672	4.56337e-05	2.78327
											2014-11-24	j	4.41152	0.00876888	0.247547	0.283121	24.427	0.0145376	5.16318e-05	2.78273
		D-2				0.25	0.328544	0.272643	0.426404	40 ppb	2014-11-17	a	4.40722	0.00878137	0.247541	0.283105	3.36799	0.00104094	1.00285e-05	2.78351
											2014-11-17	b	4.40712	0.00878158	0.247541	0.283105	3.86915	0.00119584	1.18289e-05	2.78353
											2014-11-17	c	4.40722	0.00878138	0.247541	0.283103	3.22206	0.000995844	1.07325e-05	2.78351
											2014-11-25	d	4.40701	0.00878181	0.247541	0.283114	3.23012	0.0014301	5.4434e-06	2.7836
											2014-12-16	e	4.40675	0.00878232	0.247541	0.283101	3.20146	0.00142876	1.08851e-05	2.78366
											2015-03-03	f	4.40699	0.00878183	0.247541	0.2831	2.31503	0.00113587	1.13145e-05	2.78365
										1 ppb	2014-11-24	g	4.40672	0.00878238	0.247541	0.2831	31.4816	0.0187375	-0.000773655	2.78369
											2014-11-24	h	4.408	0.00877986	0.247541	0.283125	31.8893	0.0189785	-1.17149e-05	2.78344
											2014-11-24	i	4.40723	0.00878136	0.247541	0.283108	28.0772	0.0167108	-2.00939e-06	2.78359
											2014-11-24	j	4.40864	0.00877858	0.247541	0.283119	30.6135	0.0182196	4.74692e-05	2.78331
		D-3				0.25	0.328639	0.272545	1.02592	40 ppb	2014-11-17	a	4.40746	0.00877775	0.247546	0.283101	3.77514	0.0011668	2.99383e-05	2.78347
											2014-11-17	b	4.40752	0.00877765	0.247546	0.283105	2.99784	0.000926541	2.3141e-05	2.78346
											2014-11-17	c	4.40756	0.00877757	0.247546	0.283108	2.96362	0.000915954	2.23227e-05	2.78345
											2014-12-15	d	4.4072	0.00877827	0.247546	0.283104	3.86318	0.00172406	2.54984e-05	2.78357
											2015-03-03	e	4.4074	0.00877788	0.247546	0.283104	2.51853	0.0012357	2.06597e-05	2.78357
										1 ppb	2015-03-03	f	4.40729	0.00877809	0.247546	0.283105	22.3146	0.0109485	6.27848e-05	2.78359
											2015-03-03	g	4.40819	0.00877632	0.247546	0.283122	22.3068	0.010944	5.18166e-05	2.78341
											2015-03-03	h	4.40795	0.00877683	0.247546	0.283129	21.1082	0.0103557	5.32197e-05	2.78346
											2015-03-04	i	4.40831	0.00877602	0.247546	0.283073	24.3396	0.0119434	-0.000150086	2.78338
		D-4				0.25	0.328728	0.272454	0.537639	40 ppb	2014-11-17	a	4.40702	0.0087757	0.24755	0.283104	3.34096	0.00103259	1.58225e-05	2.78355
											2014-11-17	b	4.40732	0.00877511	0.24755	0.283102	2.7623	0.000853753	1.31946e-05	2.78349
											2014-11-17	c	4.40699	0.00877576	0.24755	0.283099	3.09943	0.00095796	1.1603e-05	2.78356
											2014-12-15	d	4.40668	0.00877638	0.24755	0.283102	2.9311	0.0013081	1.07879e-06	2.78368
											2015-03-03	e	4.407	0.00877574	0.24755	0.283108	2.8488	0.00139773	1.04199e-05	2.78365
										1 ppb	2015-03-03	f	4.40767	0.0087744	0.24755	0.283101	28.3898	0.0139294	4.37571e-05	2.78351
											2015-03-03	g	4.4061	0.00877755	0.24755	0.283115	21.6926	0.0106429	2.257e-05	2.78383
											2015-03-03	h	4.40631	0.00877711	0.24755	0.283101	21.6168	0.0106063	2.02936e-05	2.78378
											2015-03-04	i	4.40603	0.00877761	0.24755	0.283071	22.6438	0.0111114	5.86498e-05	2.78383
											2015-03-04	j	4.40815	0.00877347	0.24755	0.283116	22.7973	0.0111849	5.59082e-05	2.78342
		E	0.20014	unspiked	hot plate
		E-1				0.25			0.644866	40 ppb	2014-11-17	a				0.283101	3.39907	0.00105056	3.14142e-05	1.88667
											2014-11-17	b				0.283103	2.96485	0.000916351	2.89804e-05	1.88669
											2014-11-17	c				0.283098	3.50858	0.00108442	2.81576e-05	1.88669
											2014-11-25	d				0.283099	3.97509	0.00175999	2.57804e-05	1.88677
											2014-12-15	e				0.283101	3.17483	0.00141688	3.51112e-05	1.88684
											2015-06-02	f				0.283105	3.33172	0.00170643	2.81905e-05	1.88688
										1 ppb	2014-11-24	g				0.283049	24.0476	0.0143154	9.99233e-05	1.88686
											2014-11-24	h				0.283107	23.3649	0.0139062	0.000103538	1.88686
											2014-11-24	i				0.283151	31.6465	0.0188323	0.000104617	1.88673
											2014-11-24	j				0.283141	31.4801	0.018734	5.15945e-06	1.88674
											2014-11-24	k				0.283134	31.331	0.0186456	4.6853e-05	1.88665
		E-2				0.25			0.324437	40 ppb	2014-11-17	a				0.283099	3.06838	0.00094836	1.0608e-05	1.88668
											2014-11-17	b				0.283099	3.25186	0.00100507	8.6901e-06	1.88669
											2014-11-18	c				0.283093	3.47204	0.00107315	8.89186e-06	1.88673
											2014-11-25	d				0.283102	3.09067	0.0013684	5.65094e-06	1.88675
											2014-12-15	e				0.283102	3.78979	0.00169132	1.28183e-05	1.88679
										1 ppb	2014-11-24	f				0.283062	35.0154	0.0208436	1.09768e-05	1.88675
											2014-11-24	g				0.283087	37.7163	0.0224493	8.7092e-06	1.88664
											2014-11-24	h				0.283116	29.9023	0.0177965	2.05544e-05	1.88682
											2014-11-24	i				0.283112	28.3325	0.0168625	6.70285e-05	1.88697
											2014-11-24	j				0.283108	31.0196	0.018462	7.55847e-05	1.88673
		E-3				0.25			1.12658	40 ppb	2014-11-17	a				0.283095	4.01472	0.00124087	1.25739e-05	1.8867
											2014-11-17	b				0.2831	3.66464	0.00113265	1.268e-05	1.88672
											2014-11-18	c				0.283101	3.70378	0.00114474	1.59131e-05	1.88671
											2014-12-15	d				0.283106	3.23925	0.0014456	1.16729e-05	1.88679
											2014-12-15	e				0.283104	3.42153	0.00152696	8.97174e-06	1.88678
										1 ppb	2015-03-03	f				0.283086	19.8982	0.00976358	7.52115e-06	1.88692
											2015-03-04	g				0.283122	22.4112	0.0109952	3.30928e-05	1.88677
											2015-03-04	h				0.283081	19.2755	0.0094582	6.26785e-05	1.88692
											2015-03-04	i				0.283116	22.243	0.010913	2.04437e-05	1.88683
		E-4				0.25			0.723032	40 ppb	2014-11-17	a				0.283101	3.07057	0.000949033	1.07974e-05	1.88669
											2014-11-17	b				0.283102	3.84751	0.00118916	8.90989e-06	1.88669
											2014-11-18	c				0.283102	3.3043	0.00102127	1.09511e-05	1.8867
											2014-12-15	d				0.283099	4.16661	0.00185951	1.02141e-05	1.88675
											2014-12-15	e				0.283103	3.37935	0.00150814	9.28003e-06	1.88676
											2015-03-30	f				0.283101	2.70898	0.00147267	-4.58019e-06	1.88681
											2015-03-31	g				0.283101	2.69266	0.001465	1.37096e-05	1.88682
										1 ppb	2015-03-03	h				0.283072	23.1292	0.0113495	4.1158e-05	1.88679
											2015-03-04	i				0.283125	20.6424	0.0101274	2.8733e-05	1.88678
											2015-03-04	j				0.283109	22.036	0.0108117	3.53912e-05	1.88674
											2015-03-04	k				0.283096	18.614	0.00913314	0.000101561	1.88676
		F	0.20271	unspiked	hot plate
		F-1				0.25			0.361516	40 ppb	2014-11-15	a				0.283103	4.01047	0.00123952	9.74518e-06	1.88675
											2014-11-17	b				0.283101	3.46256	0.00107019	8.40834e-06	1.88668
											2014-11-17	c				0.283101	2.98408	0.000922301	1.03804e-05	1.8867
											2014-11-25	d				0.283099	2.86198	0.00126716	6.21141e-06	1.88675
											2014-12-15	e				0.283103	3.58571	0.00160024	4.18138e-06	1.88677
										1 ppb	2014-11-24	f				0.283081	24.9319	0.0148402	1.9926e-05	1.887
											2014-11-24	g				0.283096	29.888	0.0177893	-7.6079e-06	1.88684
											2014-11-24	h				0.283079	33.147	0.0197302	3.1488e-05	1.88675
											2014-11-24	i				0.283082	32.2193	0.0191778	-5.65326e-06	1.88683
											2014-11-24	j				0.283112	25.5525	0.0152079	-5.23744e-06	1.88672
											2015-03-03	k				0.28309	20.3304	0.0099755	2.99094e-05	1.88671
		F-3				0.25			0.52219	40 ppb	2014-11-15	a				0.283103	2.21367	0.000684183	2.04051e-05	1.88677
											2014-11-17	b				0.2831	2.99319	0.000925119	2.04321e-05	1.88671
											2014-11-17	c				0.283101	2.38067	0.000735802	2.08489e-05	1.88668
											2014-11-25	d				0.283102	3.51847	0.0015578	1.80924e-05	1.88676
											2014-12-15	e				0.283104	3.20621	0.00143087	2.27096e-05	1.88677
											2015-03-31	f				0.283103	2.74652	0.0014903	1.89829e-05	1.88682
										1 ppb	2014-11-24	g				0.283073	29.0554	0.0172952	7.41227e-05	1.88669
											2014-11-24	h				0.283079	30.5677	0.0181949	-6.7167e-05	1.88677
											2014-11-24	i				0.283092	29.4241	0.0175134	3.08296e-05	1.88676
											2014-11-24	j				0.283081	21.9027	0.0130371	5.54296e-05	1.8869
											2014-11-24	k				0.28308	32.1905	0.0191608	-3.91912e-06	1.88664
		F-4				0.25			0.635096	40 ppb	2014-11-15	a				0.283099	4.05597	0.0012536	1.01194e-05	1.88681
											2014-11-17	b				0.283095	2.40393	0.000743006	1.22981e-05	1.88671
											2014-11-17	c				0.283095	3.17824	0.000982333	1.21072e-05	1.8867
											2014-12-15	d				0.2831	4.56179	0.00203586	-4.96565e-06	1.8868
											2014-12-15	e				0.283103	3.68698	0.00164543	1.27131e-05	1.88678
										1 ppb	2015-03-03	f				0.283106	24.4256	0.0119842	-6.42847e-05	1.8869
											2015-03-04	g				0.28311	16.5628	0.0081263	5.90319e-05	1.88686
											2015-03-04	h				0.283085	24.1341	0.0118421	1.85438e-05	1.88679
											2015-03-04	i				0.283092	19.1438	0.00939319	6.97422e-05	1.88688
		G	0.10077	spiked	hot plate	1	0.429296	0.272786	0.180758	40 ppb	2015-03-30	a	4.43923	0.00872266	0.255413	0.28311	3.19633	0.00170158	1.77944e-05	3.12574
											2015-03-31	b	4.43931	0.00872249	0.255413	0.283105	2.99663	0.00160779	7.25099e-06	3.12572
		H	0.20307	spiked	hot plate	1			0.0935689	40 ppb	2015-03-30	a	4.46027		0.247836	0.28311	2.54233	0.00139434	-3.52952e-05	3.20444
											2015-03-31	b	4.46046		0.247836	0.283115	3.22851	0.00171667	4.56126e-06	3.20438
	Münker et al. chemistry, this study
		A	0.05966	spiked	hot plate	1	0.348793	0.2732	7.18147	40 ppb	2012-08-16	a	4.43198	0.00875017	0.248578	0.283102	3.68794	0.00208428	5.14509e-05	2.84773
											2012-08-17	b	4.43252	0.00874912	0.248578	0.283109	4.9497	0.00279731	6.4454e-05	2.84761
											2014-03-26	c	4.43167	0.0087508	0.248578	0.283107	4.98694	0.00300598	1.0374e-05	2.84794
											2013-05-03	d	4.43166	0.00875081	0.248578	0.283104	4.16173	0.0026134	1.78945e-05	2.84797
											2013-05-03	e	4.4313	0.00875152	0.248578	0.283105	4.11094	0.0025815	8.50008e-06	2.84804
											2013-11-25	f	4.43193	0.00875026	0.248578	0.2831	7.19738	0.00379352	9.08664e-05	2.84778
											2014-11-18	g	4.43137	0.00875137	0.248578	0.283104	5.34257	0.00249562	4.22203e-05	2.84792
											2015-06-02	h	4.43168	0.00875076	0.248578	0.283108	8.53515	0.00437146	-1.7818e-05	2.84794
		B	0.05521	spiked	hot plate	1	0.377855	0.277587	1.26531	40 ppb	2013-11-25	a	4.48889	0.00877794	0.25036	0.283102	3.91517	0.00206355	1.23996e-05	2.9505
											2014-03-26	b	4.489	0.00877774	0.25036	0.283107	3.48112	0.00246043	1.55842e-05	2.95053
											2014-11-18	c	4.48834	0.00877902	0.25036	0.283102	4.14667	0.001937	1.09265e-05	2.95065
											2014-12-16	d	4.48874	0.00877823	0.25036	0.283103	3.57489	0.00159541	9.98218e-06	2.9506
											2015-06-02	e	4.48875	0.00877822	0.25036	0.283105	3.12929	0.00160275	1.1245e-05	2.95063
										1 ppb	2014-02-19	f	4.48969	0.0087764	0.25036	0.283114	14.6676	0.0127115	-1.80416e-06	2.95041
											2014-02-19	g	4.48945	0.00877687	0.25036	0.283109	19.7131	0.0170844	2.90518e-06	2.95046
											2014-02-19	h	4.48864	0.00877845	0.25036	0.283114	15.5846	0.0135062	4.00077e-05	2.95065
											2014-02-19	i	4.48826	0.00877917	0.25036	0.283093	25.3079	0.0219344	1.90231e-05	2.95074
											2014-02-20	j	4.49064	0.00877453	0.25036	0.283107	17.659	0.0153044	4.72322e-05	2.95013
											2014-02-20	k	4.49137	0.00877311	0.25036	0.283111	17.1981	0.0149047	1.20799e-05	2.94996
											2014-02-20	l	4.48946	0.00877682	0.25036	0.283097	17.5962	0.0152505	-4.06805e-06	2.9504
											2014-11-24	m	4.50443	0.00874768	0.25036	0.283109	33.0933	0.0196961	6.03592e-05	2.94698
											2014-11-24	n	4.49825	0.0087597	0.25036	0.283115	31.1324	0.0185287	-2.56045e-05	2.94842
											2015-03-03	o	4.48891	0.00877782	0.25036	0.283049	32.8453	0.0161185	8.59422e-05	2.95059
JB-1	New chemistry, this study	JB-1_1	0.0491	spiked	hot plate	1	0.270953	0.30122	0.251053	40 ppb	2014-08-04	a	3.47787	0.012294	0.245805	0.282979	2.64655	0.00130657	7.13958e-06	2.87547
											2014-11-18	b	3.47788	0.012294	0.245805	0.282979	3.74548	0.00175037	8.09053e-06	2.8754
											2014-11-25	c	3.47787	0.012294	0.245805	0.282972	3.562	0.00157781	6.64238e-06	2.87545
											2014-12-15	d	3.47786	0.0122941	0.245805	0.282978	3.21314	0.0014346	3.75735e-06	2.87546
											2015-03-30	e	3.47787	0.012294	0.245805	0.282983	2.44756	0.00135034	-1.7389e-06	2.8755
											2015-03-31	f	3.4778	0.0122943	0.245805	0.282981	3.11557	0.00166431	7.27679e-06	2.87552
	Münker et al. chemistry, this study	JB-1_2	0.05477	spiked	hot plate	1	0.282973	0.301983	1.64902	40 ppb	2013-11-25	a	3.47645	0.0123302	0.245988	0.282975	3.33775	0.00176	2.23189e-05	2.93144
											2013-11-25	b	3.47628	0.0123308	0.245988	0.282972	4.4432	0.00234293	2.2691e-05	2.93149
											2014-03-26	c	3.47654	0.0123299	0.245988	0.282977	3.36616	0.00238027	1.96912e-05	2.93147
											2014-12-16	d	3.4763	0.0123307	0.245988	0.282978	3.21492	0.00143539	2.97359e-05	2.93155
											2015-06-02	e	3.4762	0.0123311	0.245988	0.282983	3.46964	0.00177784	2.71019e-05	2.93162
										1 ppb	2014-02-19	f	3.47629	0.0123307	0.245988	0.28297	17.8873	0.0155097	6.91577e-06	2.93158
											2015-02-19	g	3.47613	0.0123313	0.245988	0.28298	17.9054	0.0155249	3.2742e-05	2.93162
											2016-02-19	h	3.47632	0.0123306	0.245988	0.282968	16.2205	0.0140645	-7.51043e-06	2.93157
											2014-02-20	i	3.47666	0.0123295	0.245988	0.282992	15.2849	0.0132522	5.9801e-06	2.93142
											2015-02-20	j	3.47704	0.0123281	0.245988	0.282993	17.847	0.0154735	-2.71328e-05	2.9313
											2016-02-20	k	3.4767	0.0123293	0.245988	0.282983	13.2885	0.0115217	4.61932e-05	2.9314
											2017-02-20	l	3.47684	0.0123288	0.245988	0.282976	18.0901	0.0156852	6.25696e-05	2.93136
											2014-11-24	m	3.47556	0.0123334	0.245988	0.282986	28.0886	0.0167248	4.02612e-05	2.9318
											2014-11-24	n	3.4771	0.0123279	0.245988	0.283001	24.0158	0.0142989	0.000130592	2.93134
											2015-03-03	o	3.4748	0.0123361	0.245988	0.282981	34.5025	0.0169358	-2.04222e-05	2.93203
BIR-1	New chemistry, this study	BIR-1_1	0.0469	spiked	hot plate	1	0.0799223	0.239291	0.156657	40 ppb	2014-08-04	a	0.560829	0.0605685	0.30609	0.283312	3.74666	0.00184751	0.000142627	2.86707
											2014-11-18	b	0.560855	0.0605657	0.30609	0.283311	3.96955	0.0018529	0.000136263	2.86696
											2015-03-30	c	0.560812	0.0605703	0.30609	0.283314	5.76225	0.00290506	1.47381e-05	2.86712
		BIR-1_2	0.05168	spiked	hot plate	1	0.0915265	0.248505	0.415359	40 ppb	2014-11-25	a	0.584234	0.0603802	0.289295	0.283265	3.81264	0.00168708	2.91955e-05	3.07859
											2015-03-30	b	0.584271	0.0603765	0.289295	0.283279	3.90895	0.00203526	3.23861e-05	3.07856
	Münker et al. chemistry, this study	BIR-1_3	0.04757	spiked	hot plate	1	0.130841	0.242912	1.01615	40 ppb	2013-11-25	a	0.569309	0.0605686	0.261881	0.283271	5.23898	0.00275964	9.3985e-05	3.81565
											2015-03-30	b	0.569302	0.0605692	0.261881	0.28326	9.94277	0.00486846	5.56005e-05	3.81578
G-2	New chemistry, this study	G-2_1	0.0493	spiked	autoclave	1	1.19617	0.096267	0.301263	40 ppb	2014-08-04	a	7.8563	0.00173919	0.384926	0.282523	3.10007	0.00153294	9.00701e-06	3.02237
											2014-11-25	b	7.85621	0.00173921	0.384926	0.282523	3.19277	0.0014165	7.36396e-06	3.02236
											2014-12-15	c	7.85496	0.00173948	0.384926	0.282519	3.48768	0.0015597	6.04824e-06	3.02254
											2015-03-30	d	7.85595	0.00173927	0.384926	0.282524	2.50914	0.0013812	7.96851e-06	3.02244
											2015-03-31	e	7.85569	0.00173932	0.384926	0.282524	2.58635	0.00141754	7.82658e-06	3.02248
	Münker et al. chemistry, this study	G-2_2	0.04801	spiked	autoclave	1	1.1631	0.100767	0.37103	40 ppb	2013-03-26	a	8.35459	0.0017119	0.375804	0.282522	3.65583	0.00220818	2.58071e-06	2.94675
											2013-05-03	b	8.35444	0.00171193	0.375804	0.282523	3.20246	0.00201515	-2.37606e-06	2.94679
											2013-11-25	c	8.35513	0.00171179	0.375804	0.282521	3.72371	0.00196668	2.4232e-05	2.94658
											2015-03-30	d	8.35451	0.00171192	0.375804	0.28253	2.33283	0.00129817	1.71755e-05	2.94677
											2015-03-31	e	8.35465	0.00171189	0.375804	0.282532	2.59413	0.00142117	2.04099e-05	2.94675

## Sheet: averages
Standard	n	average 176Hf/177Hf	95% confidence limit	2 s.d.
		(all data normalized to 0.282160)
BHVO-2
grand mean for BHVO-2 (all spiked and unspiked 40 ppb analyses)	84	0.283103	8.57591e-07	7.85996e-06
C	6	0.283106	3.90239e-06	7.43881e-06
D-1	6	0.283104	3.31791e-06	6.32465e-06
D-2	6	0.283105	5.14032e-06	9.79857e-06
D-3	5	0.283105	2.80211e-06	4.5077e-06
D-4	5	0.283103	4.48037e-06	7.20749e-06
mean D (40 ppb)	22	0.283104	1.58839e-06	6.96548e-06
D-1 (1 ppb)	4	0.283105	2.28675e-05	2.87642e-05
D-2 (1 ppb)	4	0.283113	1.7832e-05	2.24301e-05
D-3 (1 ppb)	4	0.283107	3.94441e-05	4.96152e-05
D-4 (1 ppb)	5	0.283101	2.28106e-05	3.6695e-05
E-1	6	0.283101	2.85179e-06	5.43613e-06
E-2	5	0.283099	4.6915e-06	7.54713e-06
E-3	5	0.283101	5.34247e-06	8.59433e-06
E-4	7	0.283101	1.11319e-06	2.40427e-06
mean E (40 ppb)	23	0.283101	1.2705e-06	5.88705e-06
E-1 (1 ppb)	5	0.283116	5.07002e-05	8.15605e-05
E-2 (1 ppb)	5	0.283097	2.77147e-05	4.45841e-05
E-3 (1 ppb)	4	0.283101	3.30623e-05	4.15878e-05
E-4 (1 ppb)	4	0.2831	3.55585e-05	4.47277e-05
F-1	5	0.283101	1.88625e-06	3.03437e-06
F-3	6	0.283102	1.47702e-06	2.81551e-06
F-4	5	0.283099	4.47295e-06	7.19556e-06
mean F-1, F-3, F-4 (40 ppb)	16	0.283101	1.41882e-06	5.32888e-06
F-1 (1 ppb)	6	0.28309	1.30646e-05	2.49039e-05
F-3 (1 ppb)	5	0.283081	8.7486e-06	1.40737e-05
F-4 (1 ppb)	4	0.283098	1.87413e-05	2.3574e-05
G	2	0.283107	3.3138e-06	6.31314e-06
H	2	0.283113	3.13065e-06	6.97613e-06
A	8	0.283105	2.50113e-06	5.99515e-06
B	5	0.283104	2.70653e-06	4.35394e-06
B (1 ppb)	10	0.283102	1.43173e-05	4.00666e-05
JB-1
average JB-1 both digestions (40 ppb)	11	0.282978	2.57332e-06	7.65446e-06
mean JB-1_1	6	0.282979	4.107e-06	7.82883e-06
mean JB-1_2	5	0.282977	4.91272e-06	7.903e-06
mean JB-1_2 (1 ppb)	10	0.282983	7.4794e-06	2.09309e-05
BIR-1
average BIR-1 all digestions (40 ppb)	7	0.283287	2.20784e-05	4.76849e-05
mean BIR-1_1	3	0.283312	3.69224e-06	2.52726e-06
mean BIR-1_2	2	0.283272	3.74426e-06	1.94543e-05
mean BIR-1_3	2	0.283266	7.92606e-06	1.50419e-05
G-2
average G-2 both digestions (40 ppb)	10	0.282524	2.86335e-06	8.01303e-06
mean G-2_1	5	0.282523	2.56719e-06	4.1298e-06
mean G-2_2	5	0.282526	6.3195e-06	1.01661e-05
